# Supplementary material
Source: MDPI journal article supplement (https://www.mdpi.com/2673-7167/2/3/16)
Supplement: s1 [file s1 › physchem-1668505-supplementary.pdf]

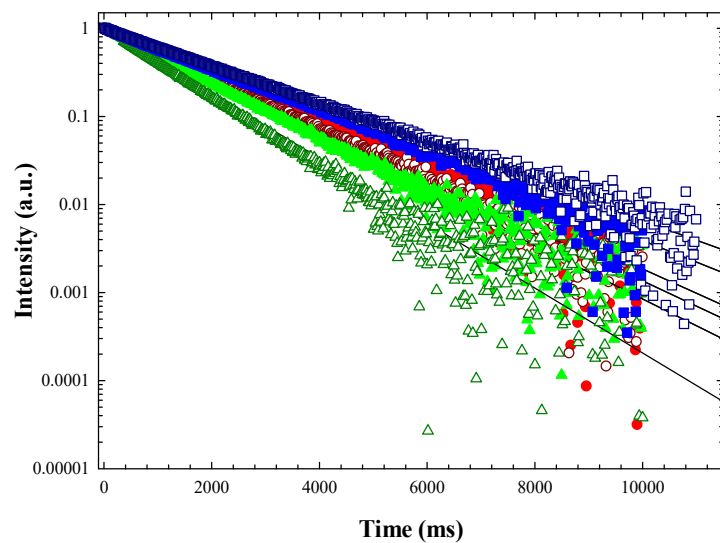

**Figure S1.** Relaxation decay curves of the solvent blends: EtOH/water, IPA/water, and MeOH/water. The mole fractions of EtOH in EtOH/water mixture were  $\sim 0.08$  (red circles) and  $\sim 0.46$  (open circles). The mole fractions of IPA in IPA/water mixture were  $\sim 0.09$  (green triangles up) and  $\sim 0.47$  (open triangles up). The mole fractions of MeOH in MeOH/water mixture were  $\sim 0.15$  (blue squares) and  $\sim 0.63$  (open squares), respectively. The solid lines through the experimental data are the single-exponential fits.

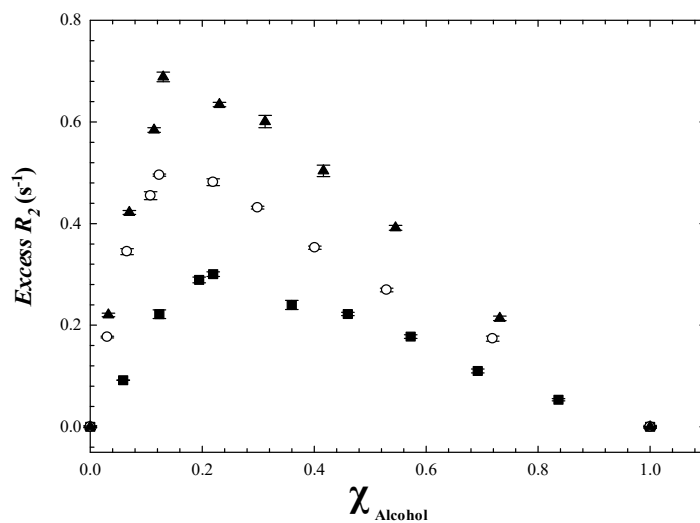

**Figure S2.** Excess solvent relaxation rate in blends of MeOH/water (squares), EtOH/water (circles) and IPA/water (triangles) as a function of alcohol mole fraction. The error bars are the standard deviation of three measurements for each sample.

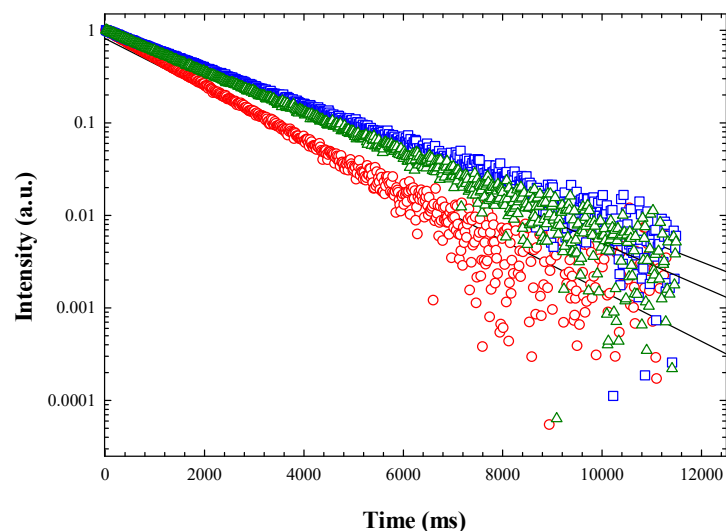

**Figure S3.** Relaxation decay curves of the solvent blends: EtOH/decane (circles), EtOH/toluene (squares), and EtOH/p-xylene (triangles up). The mole fractions of EtOH were equal to  $\sim 0.5$ ,  $\sim 0.4$ , and  $\sim 0.43$  for EtOH/decane, EtOH/toluene, and EtOH/p-xylene mixtures, respectively. The solid lines through the experimental data are the single-exponential fits.

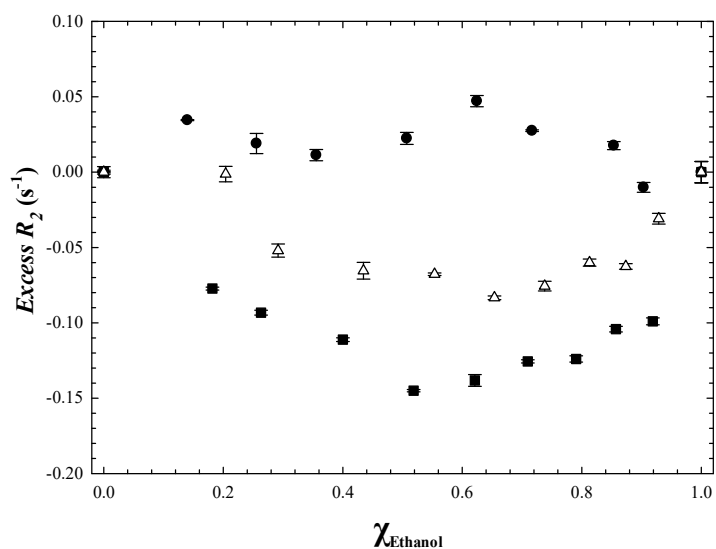

**Figure S4.** Relaxation rates of the solvent blends: EtOH/decane (circles), EtOH/toluene (squares), and EtOH/p-xylene (triangles) as a function of EtOH mole fraction. The error bars are the standard deviation of three measurements for each sample. The solid lines are guides to the eye.

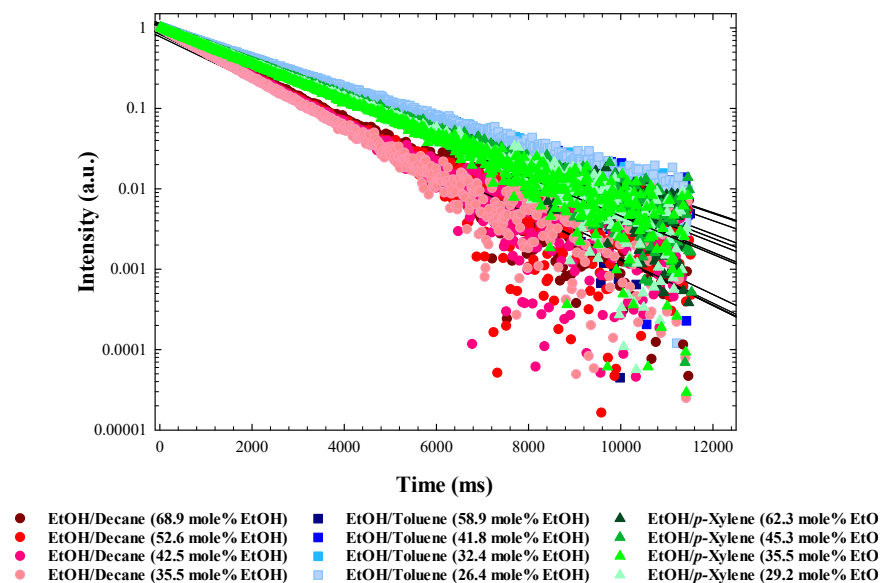

**Figure S5.** Relaxation decay curves of the solvent blends: EtOH/decane, EtOH/toluene, and EtOH/p-xylene. The mole fractions of EtOH in the EtOH/decane mixtures were  $\sim 0.68$ ,  $\sim 0.52$ ,  $\sim 0.42$ , and  $\sim 0.35$ , for EtOH/toluene mixtures were  $\sim 0.58$ ,  $\sim 0.41$ ,  $\sim 0.32$ , and  $\sim 0.26$ , and for EtOH/p-xylene mixtures were  $\sim 0.62$ ,  $\sim 0.45$ ,  $\sim 0.35$ , and  $\sim 0.29$ , respectively. The solid lines through the experimental data are the single-exponential fit.

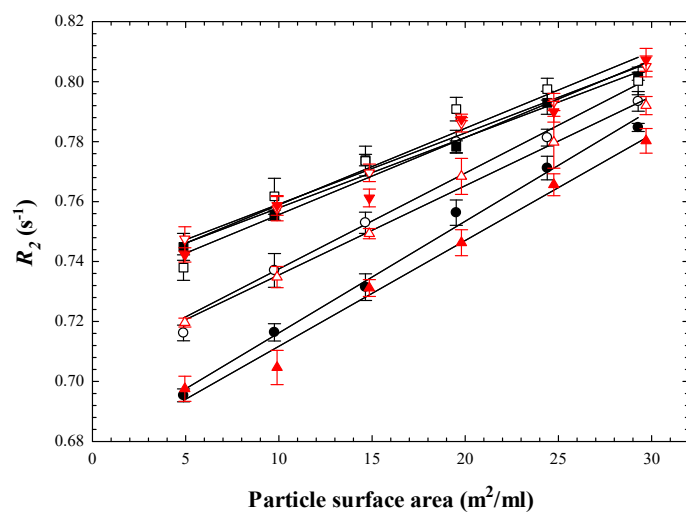

**Figure S6.** Relaxation rates of COS and HDK silica in EtOH/decane as a function of particle surface area (m<sup>2</sup>/ml). The mole fractions of EtOH in EtOH/decane mixtures were equal to  $\sim 0.35$  (COS (open squares) and HDK (open triangles down)),  $\sim 0.42$  (COS (squares) and HDK (triangles down)),  $\sim 0.52$  (COS (open circles) and HDK (open triangles up)), and  $\sim 0.68$  (COS (circles) and HDK (triangles up)). The error bars are the standard deviation of three measurements for each sample. The solid lines are guides for the eye.

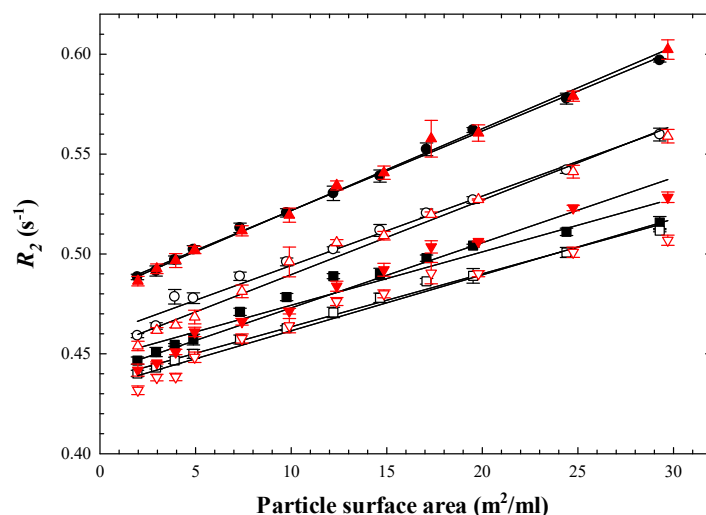

**Figure S7.** Relaxation rates of COS and HDK silica in EtOH/toluene as a function of particle surface area ( $m^2/ml$ ). The mole fractions of EtOH in EtOH/toluene mixtures were equal to  $\sim 0.26$  (COS (open squares) and HDK (open triangles down)),  $\sim 0.32$  (COS (squares) and HDK (triangles down)),  $\sim 0.41$  (COS (open circles) and HDK (open triangles up)), and  $\sim 0.58$  (COS (circles) and HDK (triangles up)). The error bars are the standard deviation of three measurements for each sample. The solid lines are guides for the eye.

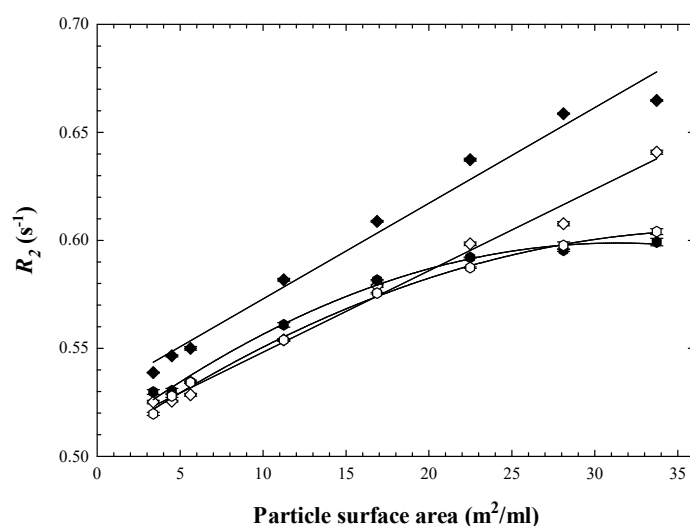

**Figure S8.** Relaxation rates of Aerosil in EtOH/p-xylene as a function of its surface area ( $m^2/ml$ ). The mole fractions of EtOH in EtOH/p-xylene mixtures were equal to  $\sim 0.29$  (open hexes),  $\sim 0.35$  (hexagons),  $\sim 0.45$  (open diamonds), and  $\sim 0.62$  (diamonds). The error bars are the standard deviation of three measurements for each sample. The solid lines are guides for the eye.

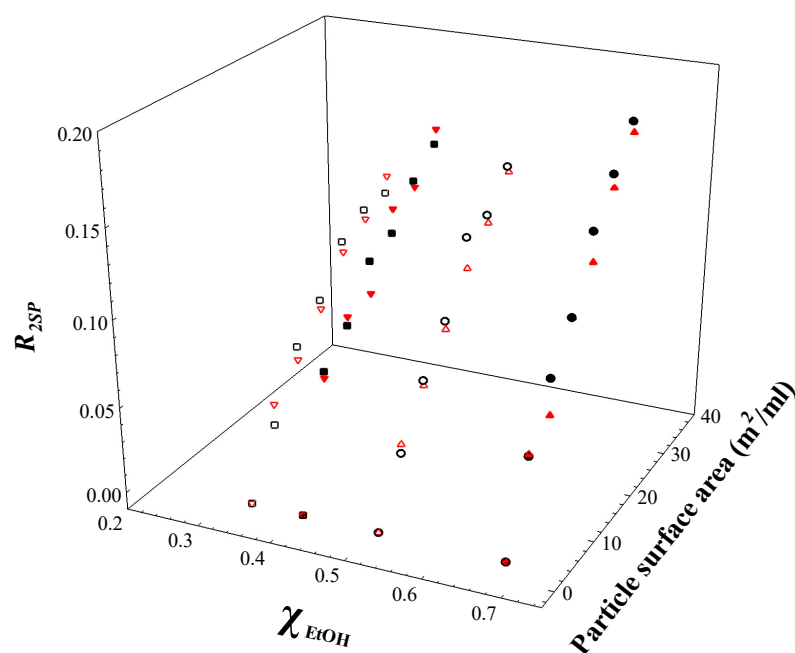

**Figure S9.** Solvent specific relaxation rates of COS and HDK silica dispersions as a function of particle surface area ( $\text{m}^2/\text{ml}$ ). The mole fractions of EtOH in EtOH/decane mixtures were equal to  $\sim 0.35$  (COS (open squares) and HDK (open triangles down)),  $\sim 0.42$  (COS (squares) and HDK (triangles down)),  $\sim 0.52$  (COS (open circles) and HDK (open triangles up)), and  $\sim 0.68$  (COS (circles) and HDK (triangles up)). The  $R_{2SP}$  data for both COS and HDK silica are normalised to the relaxation rate of the equivalent EtOH/decane mixture. The error bars are the standard deviation of three measurements for each sample. The solid lines are guides for the eye.

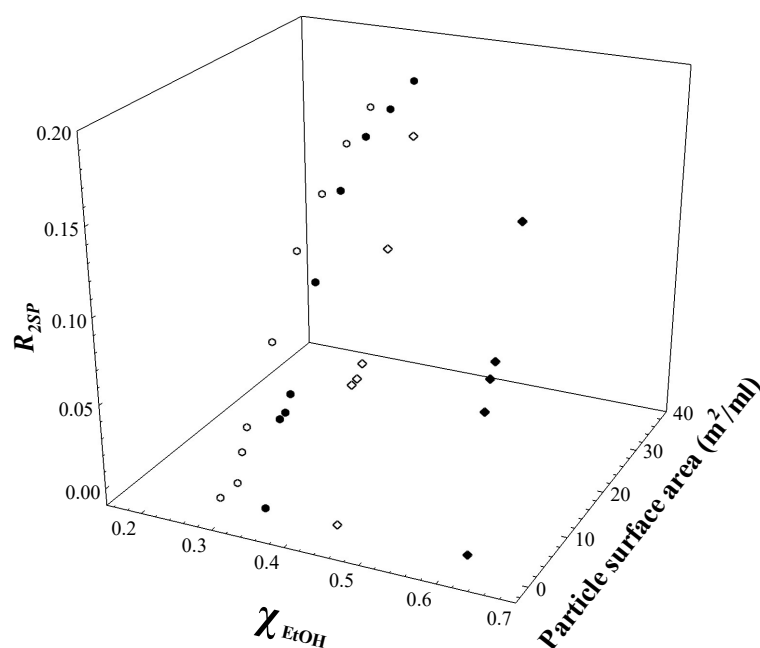

**Figure S10.** Solvent specific relaxation rate of Aerosil dispersions as a function of particle surface area ( $\text{m}^2/\text{ml}$ ). The mole fractions of EtOH in EtOH/p-xylene mixtures were equal to  $\sim 0.29$  (open hexagons),  $\sim 0.35$  (hexagons),  $\sim 0.45$  (open diamonds), and  $\sim 0.62$  (diamonds). The  $R_{2SP}$  data for Aerosil are normalised to the relaxation rate of the equivalent EtOH/p-xylene mixture. The error bars are the standard deviation of three measurements for each sample. The solid lines are guides for the eye.
